# Supplementary material
Source: publisher figshare collection journal article supplement (https://springernature.figshare.com/ndownloader/files/17494829)
Supplement: Supplementary file 1 [file 17494829]

# R functions for ``On the structure of census and survey questionnaires'', by Griffith Feeney and Samuel Feeney

# 17-October-2018

# Correspondence: Griffith Feeney <feeney@gfeeney.com>

# Functions are shown in the order in which they are called in the reproduct-results-script.


generate.metadata <- function(dofile){
  # Arg: Stata dofile
  # Val: metadata list
  
  # Deal with duplicated names after removing prefixes
  rmd <- function(x){
    y <- unique(x[duplicated(x)])
    for(i in 1:length(y)){
      z <- which(x == y[i])
      x[z] <- paste0(x[z], ".", 1:length(x[z]))
    }
    x
  }
  
  # Strip ``mw2008a_'' prefixes
  strip.prefix <- function(x) sapply(strsplit(x, "_"), function(x) ifelse(length(x) == 2L, x[2L], x[1L]))
  unquote      <- function(x) gsub("^\"|\"$", "", x)
  
  # Create record layout data frame (columns are character)
  rl <- grep("///", dofile, fixed=TRUE, value=TRUE)
  m  <- regexpr("[[:alnum:]]+ *[[:digit:]]+-[[:digit:]]+", rl)
  rl <- read.table(textConnection(gsub("-", " ", regmatches(rl, m))))
  colnames(rl) <- c("vname", "start", "end")
  rl[, "vname"] <- unquote(rl[, "vname"])    # factor -> character
  
  # Create codebook data frame (columns are character)
  cb <- gsub("'$", "`", gsub(", add", "", grep("label define", dofile, fixed = TRUE, value = TRUE)))
  cb <- read.table(textConnection(cb), quote="`", colClasses = "character")[, 3:5]
  colnames(cb) <- c("vname", "code", "definition")
  cb[, "definition"] <- unquote(cb[, "definition"])
  cb[, "vname"] <- strip.prefix(gsub("_lbl", "", cb[, "vname"], fixed = TRUE))
  
  # Create variable descriptions data frame (columns are character)
  vd <- gsub("'$", "`", grep("label var", dofile, fixed = TRUE, value = TRUE))
  vd <- read.table(textConnection(vd), quote = "`")[, 3:4]
  colnames(vd) <- c("vname","description")
  vd[, "vname"] <- as.character(vd[, "vname"])  # Line added by GF 24-Sep-2018
  vd[, "description"] <- unquote(vd[, "description"])
  vd[, "vname"]       <- rmd(strip.prefix(vd[, "vname"]))  # Problem witn this column character GF 24-Sep-2018
  vd[, "description"] <- strtrim(vd[, "description"], 30L)
  
  # Create metadata list, write .rds and .txt to metadata directory
  metadata <- list(rl, cb, vd)
  names(metadata) <- c("recordlayout", "codebook", "variabledescriptions")
  
  # Write .rds and .txt to Metadata
  # saveRDS(metadata, paste0(metadataPath,"metadata.rds"))
  # for(i in 1:3){
  #   sink(paste0(metadataPath, names(metadata)[i], ".txt"))
  #   print.data.frame(metadata[[i]], row.names = FALSE, right = FALSE)
  #   sink()
  # }
  
  metadata
}

vectorize.data <- function(file.dat.gz, recordlayout, datapath) {
  # Vectorize data file and write vectoried variables to datapath directory
  # as .gz compressed text files
  
  cat(paste0("\nLoading path.data.gz file, this may take a while . . .\n"))
  z <- gzfile(file.dat.gz)
  data.dat <- readLines(z)
  close(z)
  
  pos <- split(as.matrix(recordlayout[, 2:3]), 1:nrow(recordlayout))
  names(pos) <- recordlayout[, "vname"]
  cat(paste0("Vectorizing data.dat file, this may take a while . . .\n"))
  lvv <- lapply(pos, function(x) substr(data.dat, x[1L], x[2L]))  # List of vectorized vars
  
  cat("Writing variable character vectors to datapath, this may take a while . . . ")
  for (i in 1:length(lvv)) {
    z <- gzfile(paste0(datapath, "/", names(lvv)[i]), open = "a", compression = 1)   # Why "a"???
    writeLines(lvv[[i]], z)
    close(z)
  }
  
  cat("Done\n")
}


factorize.variables <- function(codebook, datapath) {
  # Revised 26-Dec-2017 GF
  # Arg: codebook, datapath
  # Val: NULL
  # Eff: Writes integer and factor versions of variable vector files
  problems <- function(vname, vcvec, vcb) {  # Any problems with the codebook/vcvec?
    # Arg: variable name, variable character vector, variable codebook
    # Val: Problem with variable or not?
    no.vcb <- dim(vcb)[1] == 0
    repeated.rows <- anyDuplicated(vcb) != 0
    non.unique.codes <- length(vcb[, "code"]) != length(unique(vcb[, "code"]))
    data.code.missing <- !all(unique(vcvec) %in% vcb[, "code"])
    any(no.vcb, repeated.rows, non.unique.codes, data.code.missing)
  }
  vnames <- unique(codebook[, "vname"])
  for (i in 1:length(vnames)) {
    vname <- vnames[i]
    vcvec <- readLines(paste0(datapath, "/", vname))  # Variable character vector
    if (is.factor(vcvec) == TRUE) {
      stop("Data appears to have been vectorized already, execution halted, please check")
    }
    vcb <- codebook[codebook[, 1L] == vname, ]
    if (!problems(vname, vcvec, vcb)) {
      vlevels <- vcb[, "code"]
      vlabels <- paste0(vlevels, "-", vcb[, "definition"])
      var <- suppressWarnings(factor(vcvec, levels = vlevels, labels = vlabels))
      saveRDS(var, paste0(datapath, "/", vnames[i]))
      cat(paste0("Variable '", vnames[i], "'", " factorized . . .\n"))
    } else {
      cat(paste0("Problem with ", vnames[i], " variable skipped\n"))
    }
  }
  cat("All done\n")
}


trace.gtpaths <- function(pt, origin = "BEGIN", end = "END", path = "BEGIN", paths = new.env()) {
  # Arg: pt (progression table), origin (question with which paths begin),
  #      path (path under construction), paths (see below)
  # Val: paths (environment containing paths traced)
  to.vars <- pt[pt[,"From"] == origin, "To"]
  for(to in to.vars) {
    if(to == end) {
      assign(paste(c(path, to), collapse = "-"), c(path, to), paths)
    }
    trace.gtpaths(pt, to, end, c(path, to), paths)
  }
  return(paths)
}

trace.validpaths <- function(qm, cb, fvnames) {
  origin = "BEGIN"
  paths <- new.env()
  
  validate <- function(x, pathl) {
    tmp <- new.env()
    ex <- grep(x, pathl, fixed = TRUE, value = TRUE)
    used <- sapply(fvnames, function(x) any(grepl(x, ex, fixed = TRUE)))
    usedcodes <- cb[cb[, "vname"] %in% fvnames[used], ]
    rlc <- rle(usedcodes[, "vname"])
    ind <- mapply(rep, rlc[2L], rlc[1L])
    sp <- split(as.integer(usedcodes[, "code"]), ind)
    z <- expand.grid(sp)
    eval(parse(text = paste0(names(z), "<-", "z$", names(z))), tmp)
    o <- eval(parse(text = (paste0(ex, collapse = " & "))), tmp)
    !all(!o)
  }
  
  trace <- function(origin, path, pathl = NULL) {
    to.vars <- qm[qm[,"From"] == origin, "To"]
    for(to in to.vars) {
      fil <- qm[qm[,"From"] == origin & qm[, "To"] == to, "Filter"]
      tmpl <- if(fil == "All"){pathl}else{c(pathl, fil)}
      if(to == "END") {
        allused <- sapply(fvnames, function(x) any(grepl(x, tmpl, fixed = TRUE)))
        allvalid <- all(sapply(fvnames[allused], validate, tmpl))
        if(allvalid)
          assign(paste(c(path, to), collapse = "-"), c(path, to), paths)
      }
      trace(to, c(path, to), tmpl)
    }
  }
  
  trace(origin, origin)
  paths
}


calculate.path.distribution <- function(vnames, vdomains) {
  z <- do.call(cbind, lapply(vnames, get, vdomains))  # Matrix with vdomain column for each variable
  z <- unname(split(z, 1:nrow(z)))        # List of rows of matrix, records for persons
  z <- lapply(z, as.integer)              # Coerce logical to integer, TRUE -> 1, FALSE -> 0
  z <- sapply(z, paste0, collapse = "")   # String of 1's and 0's representing path for each person
  fz <- table(z)                          # Frequency distribution of persons by path
  return(fz)
}


calculate.variable.domains <- function(pt, fv) {
  # Arg: progression table, environment containing filter variables
  # Val: environment containing variable domains
  vdomains <- new.env()
  vdomains$BEGIN <- rep(TRUE, length(fv[[ls(fv)[1L]]]))
  fv$All <- TRUE
  for (i in 1:dim(pt)[1L]) {
    from.var <- pt[i, "From"]
    from.domain <- vdomains[[from.var]]
    filter <- eval(parse(text = pt[i, "Filter"]), fv)
    to.domain <- from.domain & filter  # If not partial, done
    to.var <- pt[i, "To"]              # If partial, union with previous partial
    partial <- i > 1 && is.element(to.var, pt[1:(i - 1), "To"])
    if (partial) {
      to.domain <- to.domain | vdomains[[to.var]]
    }
    vdomains[[to.var]] <- to.domain
  }
  vdomains
}


get.fvnames <- function(pt) {
  # Arg: progression table
  # Val: Character vector of filter variable names
  vnames <- setdiff(unique(pt[, "From"]), "BEGIN")  # Get variable names from map
  x <- paste(pt[, "Filter"], collapse = " ; ")      # Create string of filter expressions
  # Loop through variable names, identify which are filter variables
  fvnames <- NULL
  for(vname in vnames) {
    if(any(grepl(vname, x, fixed = TRUE))) {
      fvnames <- c(fvnames, vname)
    }
  }
  fvnames
}


get.variables <- function(vnames, datapath) {
  # Arg: vnames (vector of variable names), datapath
  # Val: environment containing vnames variables
  # if (output == "list") {
  #   var.list <- vector(mode = "list", length = length(vnames))
  #   names(var.list) <- vnames
  #   for (i in 1:length(vnames)) {
  #     var.list[[i]] <- readRDS(paste0(datapath, "/", vnames[i]))
  #   }
  #   return(var.list)
  # }
  # if (output == "environment") {
    vars.env <- new.env()
    for (i in 1:length(vnames)) {
      vars.env[[vnames[i]]] <- readRDS(paste0(datapath, "/", vnames[i]))
    }
  return(vars.env)
  #}
}


get.codes.from.encoded.factors <- function(var) {
  # Arg: Variable as factor with variable codes encoded in factor labels
  # Val: Variable as numeric code vector
  # GF 08-Nov-2017 Odense
  n <- min(unique(regexpr(pattern = "-", var)))
  return(as.integer(substr(var, 1, n - 1)))
}
